# Supplementary material for: Genetic and morphometric variability between populations of Betula ×oycoviensis from Poland and Czechia: A revised view of the taxonomic treatment of the Ojców birch
Source: PLoS One. 2020 Dec 16;15(12):e0243310. doi: 10.1371/journal.pone.0243310 (PMC7743968; doi:10.1371/journal.pone.0243310)
Supplement: S3 Table — (XLSX) [file pone.0243310.s004.xlsx]

## Sheet: Markers
	S3 Table. Description of used microsatellite markers (taken from Kuneš et al. [31])
	Marker ID	Primer sequence (5′ → 3′)	Repeat sequence	Annealing temperature	Source
	L012	F: TGGTTGACGTGACGTTGATT	(GA)6TA(GA)6	57 °C	[26]
		R: GGCCCATAGGGAAGATAAGC
	L022	F: AACGGACAAATTCACGGGTA	(CT)18
		R: GGAGTTCATGGATTGGAGGA
	L2.7	F: CCGCCGGTAACACTAAACC	(TC)8(TA)8(TG)11TT(TG)3
		R: GAGGGAAGAAAATTCAACGG
	L3.1	F: CTCCTTAGCTGGCACGGAC	(CT)3CC(CT)2CC(CT)13AT(CT)5
		R: CCCTTCTTCATAAAACCCTCAA
	L3.4	F: AACCCTCGTTTGGCTACTGA	(GTAT)3(GT)5
		R: GAACAGTTACTAGTCAAACTGAAAACC
	L5.4	F: AAGGGCACCTGCAGATTAGA	(TC)26
		R: AAAATTGCAACAAAACGTGC
	L7.1	F: GTTTTGGGTTTCCACTTCCA	(CT)12CCTT(CT)4
		R: ACTGGTAATACCTTTACCAAGCC
	L7.8	F: GGCCAACAGATATAAAACGACG	(CT)11GC(AATG)2
		R: TTTTAAATGCCCACCTTCCC
	Bema1	F: ATGCTTCAGAATCCCGAATTGTTC	(TA)3TGAACG(TA)3AAACAGACAA(TA)3	55 °C	[27]
		R: GTTTAACCAGAAACTACCACGTGAACCA
	Bema7	F: AGGTTGCTCAACCTAACCAACAT	(TC)8
		R: GTTTGGACAAGAACAACCACCAAG
	Bema11	F: ACCAAGTGAACTTACAAAGGCGA	(TC)10
		R: GTTTCCTGCTATAAGGCCTGCACCT
	Bepl3	F: ACAATATCTCACAAATCTGCCGC	(TC)9	55 °C	[28]
		R: GTTTAACCTGAACGTCCTCAAAGGTCC
